# Supplementary material for: Medication Management of Anxiety and Depression by Primary Care Pediatrics Providers: A Retrospective Electronic Health Record Study
Source: bioRxiv or medRxiv preprint supplement (doi:10.1101/2021.04.11.21255276), 2021-04-17
Supplement: Supplementary file [file media-1.pdf]

# Supplement 1: Cohort Selection Diagram

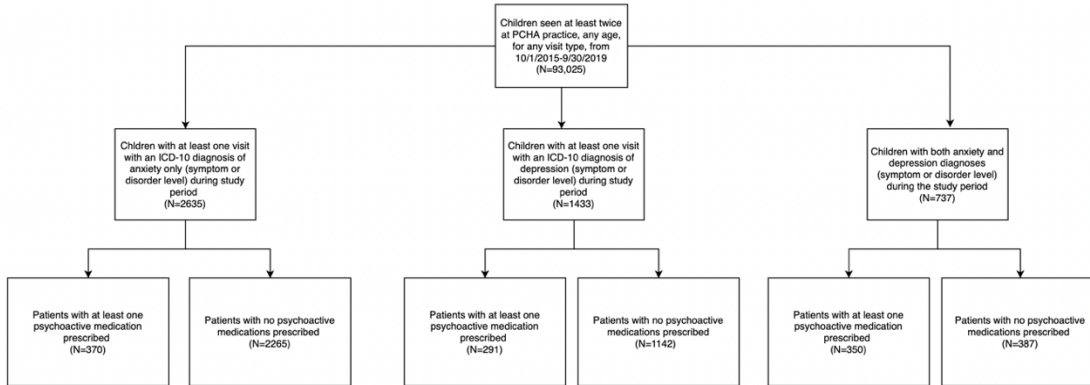

## Supplement 2 : ICD 10 Codes and Text descriptors Used for Study Outcomes

| Condition      | ICD-10 Diagnosis Code                                                                                                                                                                                                                                                                                                                                                                                     | ICD-10 Text Descriptors                                                                                                                                                                                                                                                                                                       |
|----------------|-----------------------------------------------------------------------------------------------------------------------------------------------------------------------------------------------------------------------------------------------------------------------------------------------------------------------------------------------------------------------------------------------------------|-------------------------------------------------------------------------------------------------------------------------------------------------------------------------------------------------------------------------------------------------------------------------------------------------------------------------------|
| Anxiety        |                                                                                                                                                                                                                                                                                                                                                                                                           |                                                                                                                                                                                                                                                                                                                               |
| Symptom Level  | R45.2                                                                                                                                                                                                                                                                                                                                                                                                     | Unhappiness (worries NOS)                                                                                                                                                                                                                                                                                                     |
|                | R45.82                                                                                                                                                                                                                                                                                                                                                                                                    | Worries                                                                                                                                                                                                                                                                                                                       |
|                | R45.89                                                                                                                                                                                                                                                                                                                                                                                                    | Feeling worried, anxious appearance, feeling anxious                                                                                                                                                                                                                                                                          |
| Disorder Level | F06.4,F10.180,F10.280,F12.980,F13.180,F13.280,F13.980,F14.180,F14.280,F14.980,F15.180,F15.280,F15.980,F16.180,F16.280,F16.980,F18.180,F18.280,F18.980,F19.180,F19.280,F19.980,F31.3,F40.0,F40.00,F40.01,F40.02,F40.10,F40.11,F40.210,F40.218,F40.220,F40.228,F40.23,F40.230,F40.231,F40.233,F40.240,F40.241,F40.242,F40.243,F40.248,F40.291,F40.298,F40.8,F40.9,F41.0,F41.1,F41.3,F41.8,F41.9,F93.0,F94.0 | All                                                                                                                                                                                                                                                                                                                           |
| Depression     |                                                                                                                                                                                                                                                                                                                                                                                                           |                                                                                                                                                                                                                                                                                                                               |
| Symptom Level  | R45.7                                                                                                                                                                                                                                                                                                                                                                                                     | State of emotional stress or shock                                                                                                                                                                                                                                                                                            |
|                | R45.81                                                                                                                                                                                                                                                                                                                                                                                                    | Low self esteem                                                                                                                                                                                                                                                                                                               |
|                | R45.84                                                                                                                                                                                                                                                                                                                                                                                                    | Anhedonia                                                                                                                                                                                                                                                                                                                     |
|                | R45.851                                                                                                                                                                                                                                                                                                                                                                                                   | Suicidal ideations                                                                                                                                                                                                                                                                                                            |
|                | R45.86                                                                                                                                                                                                                                                                                                                                                                                                    | Emotional lability                                                                                                                                                                                                                                                                                                            |
|                | R45.89                                                                                                                                                                                                                                                                                                                                                                                                    | Sad, sad mood, feeling sad, sadness, feeling of sadness, at risk for self harm, depressed affect, difficulty coping, dysphoric mood, feelings of worthlessness, feels depressed, flat affect, non-suicidal depressed mood, non-suicidal self harm, self-esteem disturbance, suicidal risk, tearfulness, thoughts of self harm |
| Disorder Level | F06.30,F06.31,F06.32,F06.34,F10.14,F10.24,F10.94,F11.14,F11.24,F11.94,F13.14,F13.24,F13.94,F14.14,F14.24,F14.94,F15.14,F15.24,F15.94,F16.14,F16.24,F16.94,F18.14,F18.24,F18.94,F19.14,F19.24,F19.94,F32.0,F32.1,F32.2,F32.3,F32.4,F32.5,F32.8,F32.81,F32.89,F32.9,F33.0,F33.1,F33.2,F33.3,F33.40,F33.41,F33.42,F33.8,F33.9,F34.1,F34.81,F34.89,F34.9                                                      | All                                                                                                                                                                                                                                                                                                                           |

### Supplement 3: Medication Prevalence By Age

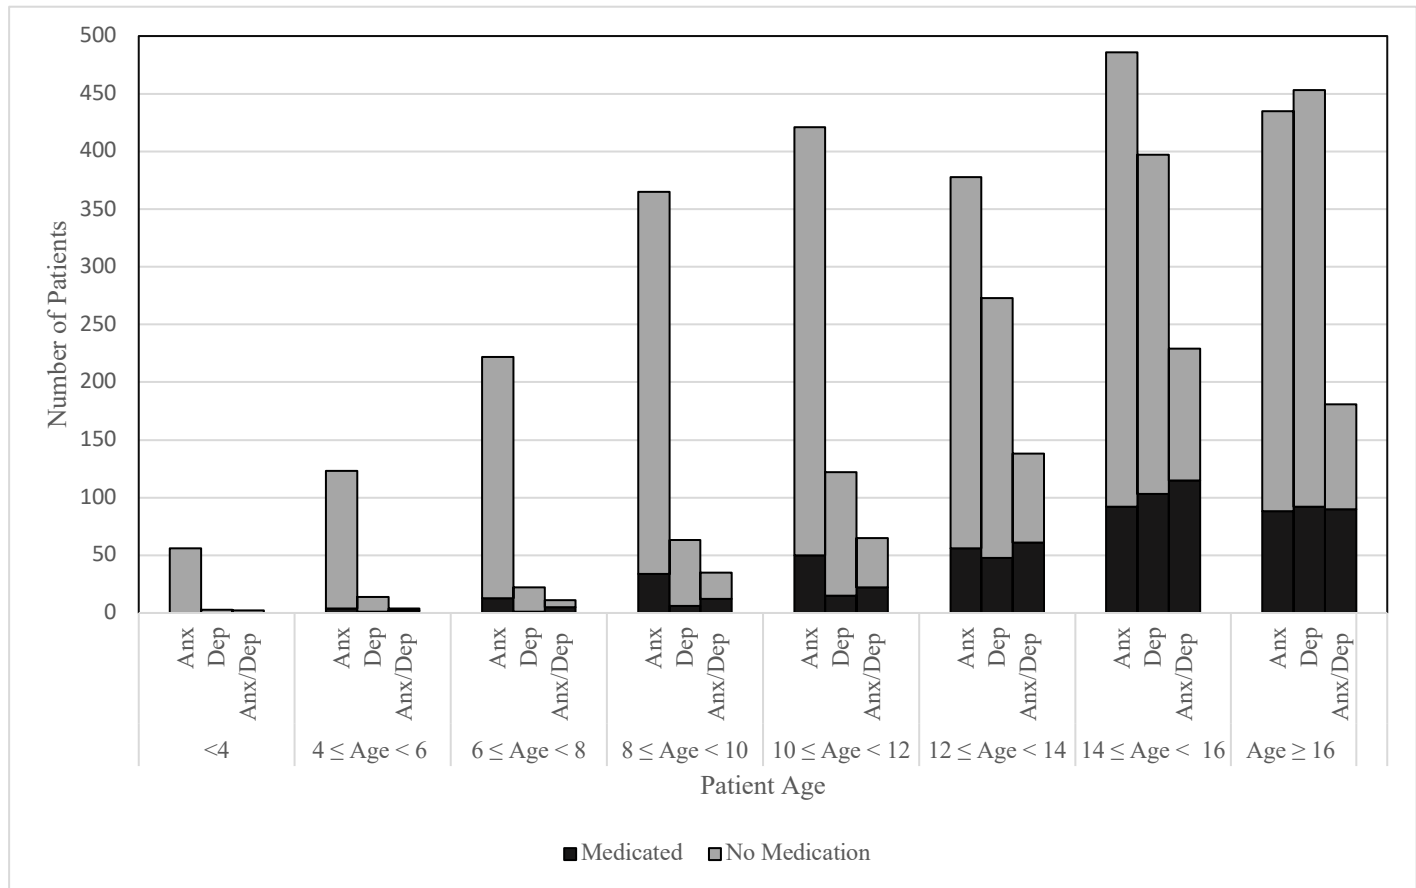

### Supplement 4: Medication Prevalence by Race and Ethnicity

| Diagnostic Category                           | Ethnicity         |                     | Race             |                 |                     |                   |
|-----------------------------------------------|-------------------|---------------------|------------------|-----------------|---------------------|-------------------|
|                                               | Hispanic          | Non-Hispanic        | Asian            | Black           | White               | Other             |
| Anxiety<br>(# Medicated/Total)<br>(%)         | 30/265<br>(11.3%) | 178/1409<br>(12.6%) | 17/241<br>(7.1%) | 7/72<br>(9.7%)  | 160/1011<br>(15.8%) | 37/427<br>(8.7%)  |
| Depression<br>(# Medicated/Total)<br>(%)      | 24/175<br>(13.7%) | 141/756<br>(18.7%)  | 22/157<br>(14%)  | 6/45<br>(13.3%) | 117/527<br>(22.2%)  | 34/268<br>(12.7%) |
| Anxiety+Depression (#<br>Medicated/Total) (%) | 34/83<br>(41.0%)  | 155/356<br>(43.5%)  | 14/50<br>(28%)   | 11/23<br>(47.%) | 134/266<br>(50.4%)  | 52/139<br>(37.4%) |

**Supplemental Figure 5: Medication Prevalence by Patient Factor for 6-18 year old patients**

|                                       | Anxiety (N=2385)     |                       | Depression (N=1390)  |                      | Anxiety+Depression (N=723) |                     |
|---------------------------------------|----------------------|-----------------------|----------------------|----------------------|----------------------------|---------------------|
|                                       | Medicated            | Nonmedicated          | Medicated            | Nonmedicated         | Medicated                  | Nonmedicated        |
| Age                                   |                      |                       |                      |                      |                            |                     |
| 6-12                                  | 125/1185<br>(10.54%) | 1060/1185<br>(89.45%) | 40/325<br>(12.30%)   | 285/325<br>(87.70%)  | 61/162<br>(37.65%)         | 101/162<br>(62.35%) |
| 3-18                                  | 232/1200<br>(19.33%) | 968/1200<br>(80.67%)  | 245/1065<br>(23.00%) | 820/1065<br>(77.00%) | 282/561<br>(50.26%)        | 279/561<br>(49.74%) |
| Sex                                   |                      |                       |                      |                      |                            |                     |
| Female                                | 184/1352<br>(13.60%) | 1168/1352<br>(86.40%) | 166/833<br>(19.92%)  | 667/833<br>(80.08%)  | 218/462<br>(47.18%)        | 244/462<br>(52.82%) |
| Male                                  | 173/1033<br>(16.74%) | 860/1033<br>(83.26%)  | 119/557<br>(21.36%)  | 438/557<br>(78.64%)  | 125/261<br>(47.89%)        | 136/261<br>(52.11%) |
| Insurance                             |                      |                       |                      |                      |                            |                     |
| Private                               | 280/1869<br>(14.98%) | 1589/1869<br>(85.02%) | 212/1004<br>(21.12%) | 792/1004<br>(78.88%) | 263/530<br>(49.62%)        | 267/530<br>(50.38%) |
| Public                                | 69/425<br>(16.23%)   | 356/425<br>(83.77%)   | 59/343<br>(17.21%)   | 284/343<br>(82.79%)  | 64/159<br>(40.25%)         | 95/159<br>(59.75%)  |
| Military                              | 6/65<br>(9.23%)      | 59/65<br>(90.77%)     | 11/33<br>(33.33%)    | 22/33<br>(66.67%)    | 13/28<br>(46.42%)          | 15/28<br>(53.57%)   |
| NA                                    | 2/26<br>(7.70%)      | 24/26<br>(92.30%)     | 3/10<br>(30.00%)     | 7/10<br>(70.00%)     | 3/6<br>(50.00%)            | 3/6<br>(50.00%)     |
| Number of Co-morbidities              |                      |                       |                      |                      |                            |                     |
| 0                                     | 170/1570<br>(10.83%) | 1400/1570<br>(89.17%) | 160/924<br>(17.32%)  | 764/924<br>(82.68%)  | 152/366<br>(41.53%)        | 214/366<br>(58.47%) |
| 1                                     | 133/637<br>(20.88%)  | 504/637<br>(79.12%)   | 92/369<br>(24.94%)   | 277/369<br>(75.06%)  | 123/244<br>(50.40%)        | 121/244<br>(49.60%) |
| 2+                                    | 54/178<br>(30.34%)   | 124/178<br>(69.66%)   | 33/97<br>(34.03%)    | 64/97<br>(65.97%)    | 68/113<br>(60.18%)         | 45/113<br>(39.82%)  |
| Comorbid Diagnoses                    |                      |                       |                      |                      |                            |                     |
| ADHD                                  | 116/452<br>(25.66%)  | 336/452<br>(74.34%)   | 69/220<br>(31.37%)   | 151/220<br>(68.63%)  | 93/170<br>(54.71%)         | 77/170<br>(45.29%)  |
| ASD                                   | 40/104<br>(38.46%)   | 64/104<br>(61.54%)    | 4/30<br>(13.33%)     | 26/30<br>(86.67%)    | 15/19<br>(78.94%)          | 4/19<br>(21.06%)    |
| Sleep                                 | 38/227<br>(16.74%)   | 189/227<br>(83.26%)   | 27/118<br>(22.88%)   | 91/118<br>(77.12%)   | 60/117<br>(51.28%)         | 57/117<br>(48.72%)  |
| Trauma and Stressor Related Disorders | 10/82<br>(12.20%)    | 72/82<br>(87.8%)      | 16/74<br>(21.62%)    | 58/74<br>(78.38%)    | 30/57<br>(52.63%)          | 27/57<br>(47.37%)   |
| Referral to DPB or Psychiatry         | 43/232<br>(18.54%)   | 189/232<br>(81.46%)   | 48/208<br>(23.08%)   | 160/208<br>(76.92%)  | 63/143<br>(44.05%)         | 80/143<br>(55.95%)  |
